# Supplementary material
Source: MDPI journal article supplement (https://www.mdpi.com/search?q=ijms-17-00764)
Supplement: s001 [file ijms-17-00764-s001.pdf]

# Supplementary Materials: Development of Therapeutic Chimeric Uricase by Exon Replacement/Restoration and Site-Directed Mutagenesis

Guangrong Xie, Weizhen Yang, Jing Chen, Miaomiao Li, Nan Jiang, Baixue Zhao, Si Chen, Min Wang and Jianhua Chen

**Table S1.** Primers used for exon replacement and restoration (overlapping sequences designed for SOE-PCR are colored).

| Primer | Description                                                                                                                                                            | Sequence                                            |
|--------|------------------------------------------------------------------------------------------------------------------------------------------------------------------------|-----------------------------------------------------|
| P1     | Forward primer for <i>wpu</i> exon1 with restriction site <i>Nde</i> I (underlined)                                                                                    | 5'-GGAATTCCATATGGCTCATTACCGTAATGACT-3'              |
| P2     | Reverse primer for <i>wpu</i> exon 2                                                                                                                                   | 5'-GCCTTTGAACTTCGCCAGGACATTAACCTGTG-3'              |
| P3     | Forward primer for <i>wpu</i> exon 3                                                                                                                                   | 5'-ATCAAAAAGCATAGAAAACCTTTGCTGTGAC-3'               |
| P4     | Reverse primer for <i>wpu</i> exon 3                                                                                                                                   | 5'-CTTTTCAAAACGCTTCCAAGAACTTCTCCAC-3'               |
| P5     | Forward primer for <i>wpu</i> exon 4                                                                                                                                   | 5'-AATGGAGTTAAGCATGTCCATGCATTTA-3'                  |
| P6     | Reverse primer for <i>wpu</i> exon 4                                                                                                                                   | 5'-ATTCTTATCTGTTC AACCTCACAGAAGTGCG-3'              |
| P7     | Forward primer for <i>wpu</i> exon 5                                                                                                                                   | 5'-GGACCTCCAGTCATTCATTCTGGAATC-3'                   |
| P8     | Reverse primer for <i>wpu</i> exon 5                                                                                                                                   | 5'-CCAGGTGGCCTCAAAGTCCACATCTCTGCC-3'                |
| P9     | Forward primer for <i>wpu</i> exon 6                                                                                                                                   | 5'-GACACTGTTAGGAGCATTGTCCTGCAGA-3'                  |
| P10    | Reverse primer for <i>wpu</i> exon 6                                                                                                                                   | 5'-CTCAGGAACCTGGCCAGGGTGAGCACCTGGATGT-3'            |
| P11    | Forward primer for <i>wpu</i> exon 7                                                                                                                                   | 5'-ATAGAAGATATGGAAATCAGCCTGCCAA-3'                  |
| P12    | Reverse primer for <i>wpu</i> exon 8 with restriction site <i>Hind</i> III (underlined)                                                                                | 5'-CCCAAGCTTTCACAGCCTTGAAGTCAGC-3'                  |
| P13    | Forward primer for <i>dhu</i> exon1 with restriction site <i>Nde</i> I (underlined)                                                                                    | 5'-GGAATTCCATATGGCCCACTACCATAACAAC-3'               |
| P14    | Reverse primer for <i>dhu</i> exon 2                                                                                                                                   | 5'-AAAAGTTTCTATGCTTTGATTTCTTAAACTTTGCCA-3'          |
| P15    | Forward primer for <i>dhu</i> exon 3                                                                                                                                   | 5'-TGTCCTGGCGAAGTTC AAAGGCATCAAAAAGCATAGAAG-3'      |
| P16    | Reverse primer for <i>dhu</i> exon 3                                                                                                                                   | 5'-GCATGGACATGCTTAACTCCATTCTTCCAAGATGCTT-3'         |
| P17    | Forward primer for <i>dhu</i> exon 4                                                                                                                                   | 5'-GAAGCGTTTGGAAAAGAATGGAGTTAAGCATGTC-3'            |
| P18    | Reverse primer for <i>dhu</i> exon 4                                                                                                                                   | 5'-GAATGAATGACTGGAGGTCCACTTCTCAGCTGTCAA-3'          |
| P19    | Forward primer for <i>dhu</i> exon 5                                                                                                                                   | 5'-TGAACAGATAAGGAATGGACCCCAAGTCATTC-3'              |
| P20    | Reverse primer for <i>dhu</i> exon 5                                                                                                                                   | 5'-ACAATGCTCCTAACAGTGTCCAGGTAGCCTTGAAGT-3'          |
| P21    | Forward primer for <i>dhu</i> exon 6                                                                                                                                   | 5'-ACTTTGAGGCCACCTGGGACACCATTCCGGAC-3'              |
| P22    | Reverse primer for <i>dhu</i> exon 6                                                                                                                                   | 5'-GCTGATTTCCATATCTTCTATCGCAGGAAGTCCGGTC-3'         |
| P23    | Forward primer for <i>dhu</i> exon 7                                                                                                                                   | 5'-TGGGCCAGGTTCTGAGATAGAAGATGGAATCC-3'              |
| P24    | Reverse primer for <i>dhu</i> exon 8 with restriction site <i>Hind</i> III (underlined)                                                                                | 5'-CCCAAGCTTTCACAGTCTTGAAGACAACCTCC-3'              |
| P25    | Forward primer for amino acid fragment 22–304 of H <sub>1-2</sub> P <sub>3</sub> H <sub>4</sub> P <sub>5-6</sub> H <sub>7-8</sub> and should be paired with P24        | 5'-GAAGGATATGGTAAAAGTTTTCATATTCAGCGAGATGGAAAGT-3'   |
| P26    | Reverse primer for amino acid fragment 1–36 of H <sub>1-2</sub> P <sub>3</sub> H <sub>4</sub> P <sub>5-6</sub> H <sub>7-8</sub> and should be paired with P13          | 5'-ACTTTCCATCTCGTGAATATGCAAAAACCTTTTACCATATCCTTC-3' |
| P27    | Forward primer for amino acid fragment 79–304 of H <sub>1-2</sub> P <sub>3</sub> H <sub>4</sub> P <sub>5-6</sub> H <sub>7-8</sub> (E24D) and should be paired with P24 | 5'-GGCAAAAGTTTAAAGGCATCAAAAAGCATAGAAG-3'            |
| P28    | Reverse primer for amino acid fragment 1–84 of H <sub>1-2</sub> P <sub>3</sub> H <sub>4</sub> P <sub>5-6</sub> H <sub>7-8</sub> (E24D) and should be paired with P13   | 5'-GATGCCTTAAACTTTGCCAAGACATGAAC-3'                 |

The primer in red is the overlapping sequence used in SOE-PCR.
